# Supplementary material for: A point-prevalence study on community and inpatient Clostridioides difficile infections (CDI): results from Combatting Bacterial Resistance in Europe CDI (COMBACTE-CDI), July to November 2018
Source: PubMed Central journal article supplement (PMC9248264; doi:10.2807/1560-7917.es.2022.27.26.2100704), 2022-06-30
Supplement: 21-00704_DAVIES_Supplement.pdf [file 21-00704_DAVIES_Supplement.pdf]

## Supplementary material

This supplementary material is hosted by *Eurosurveillance* as supporting information alongside the article "A point-prevalence study on community and inpatient *Clostridioides difficile* infections (CDI): results from Combatting Bacterial Resistance in Europe CDI (COMBACTE-CDI), July to November 2018", on behalf of the authors who remain responsible for the accuracy and appropriateness of the content. The same standards for ethics, copyright, attributions and permissions as for the article apply. Supplements are not edited by *Eurosurveillance* and the journal is not responsible for the maintenance of any links or email addresses provided therein.

### Content:

**Supplementary Figure S1. Organisms detected by the BioFire FilmArray GI Panel assay.**

**Supplementary Table S1. Metadata of undiagnosed CDI cases.**

**Supplementary Table S2. Features, previous exposure, and co-morbidities of undiagnosed adult CDI cases.**

**Supplementary Figure S2. Number of PCR ribotypes isolated from samples submitted.**

**Supplementary Table S3. Location of the participants.**

**Supplementary Table S4. Categorical variables (previous exposure) of cases and CD participants groups.**

**Supplementary Table S5. Categorical variables (number and type of co-morbidities) of cases and CD participants groups.**

**Supplementary Table S6. Categorical variables (exposure) of SIMOApós participants group.**

**Supplementary Table S7. Categorical variables (number and type of co-morbidities) of SIMOApós participants group.**

### Supplementary Figure S1. Organisms detected by the BioFire FilmArray GI Panel assay.

Samples were positive or negative for *C. difficile* toxin (Cell-cytotoxin neutralisation assay; CCNA).

None= None detected. ADENOVLDS=Adenovirus. ASTROVLDS=Astrovirus. CAMPLYDS=Campylobacter. CRYPOSlds=Cryptosporidium. CYCCAYLDS= Cyclospora cayetanensis. EAECLDS=E. coli Enteroaggregative (EAEC). EIECLDS= Shigella/Enteroinvasive E. coli (EIEC). ENTHISLDS=Entamoeba histolytica. EPECLDS=E. coli Enteropathogenic (EPEC). ETECLDS=E. coli Enterotoxigenic (ETEC). GIRLAMLDS=Giardia lamblia. NOVOVLDS=Norovirus. O157LDS=E. coli O157. PLESHILDS=Plesiomonas Shigelloides. ROTAVLDS=Rotavirus. SALMLALDS=Salmonella. SAPOVLDS=Sapovirus. STECLDS=E. coli Shiga - Like Toxin - Producing (STEC). VIBCHLLDS=Vibrio Cholerae. VICRIOLDS=Vibrio. YERENTLDS=Yersinia Enterocolitica.

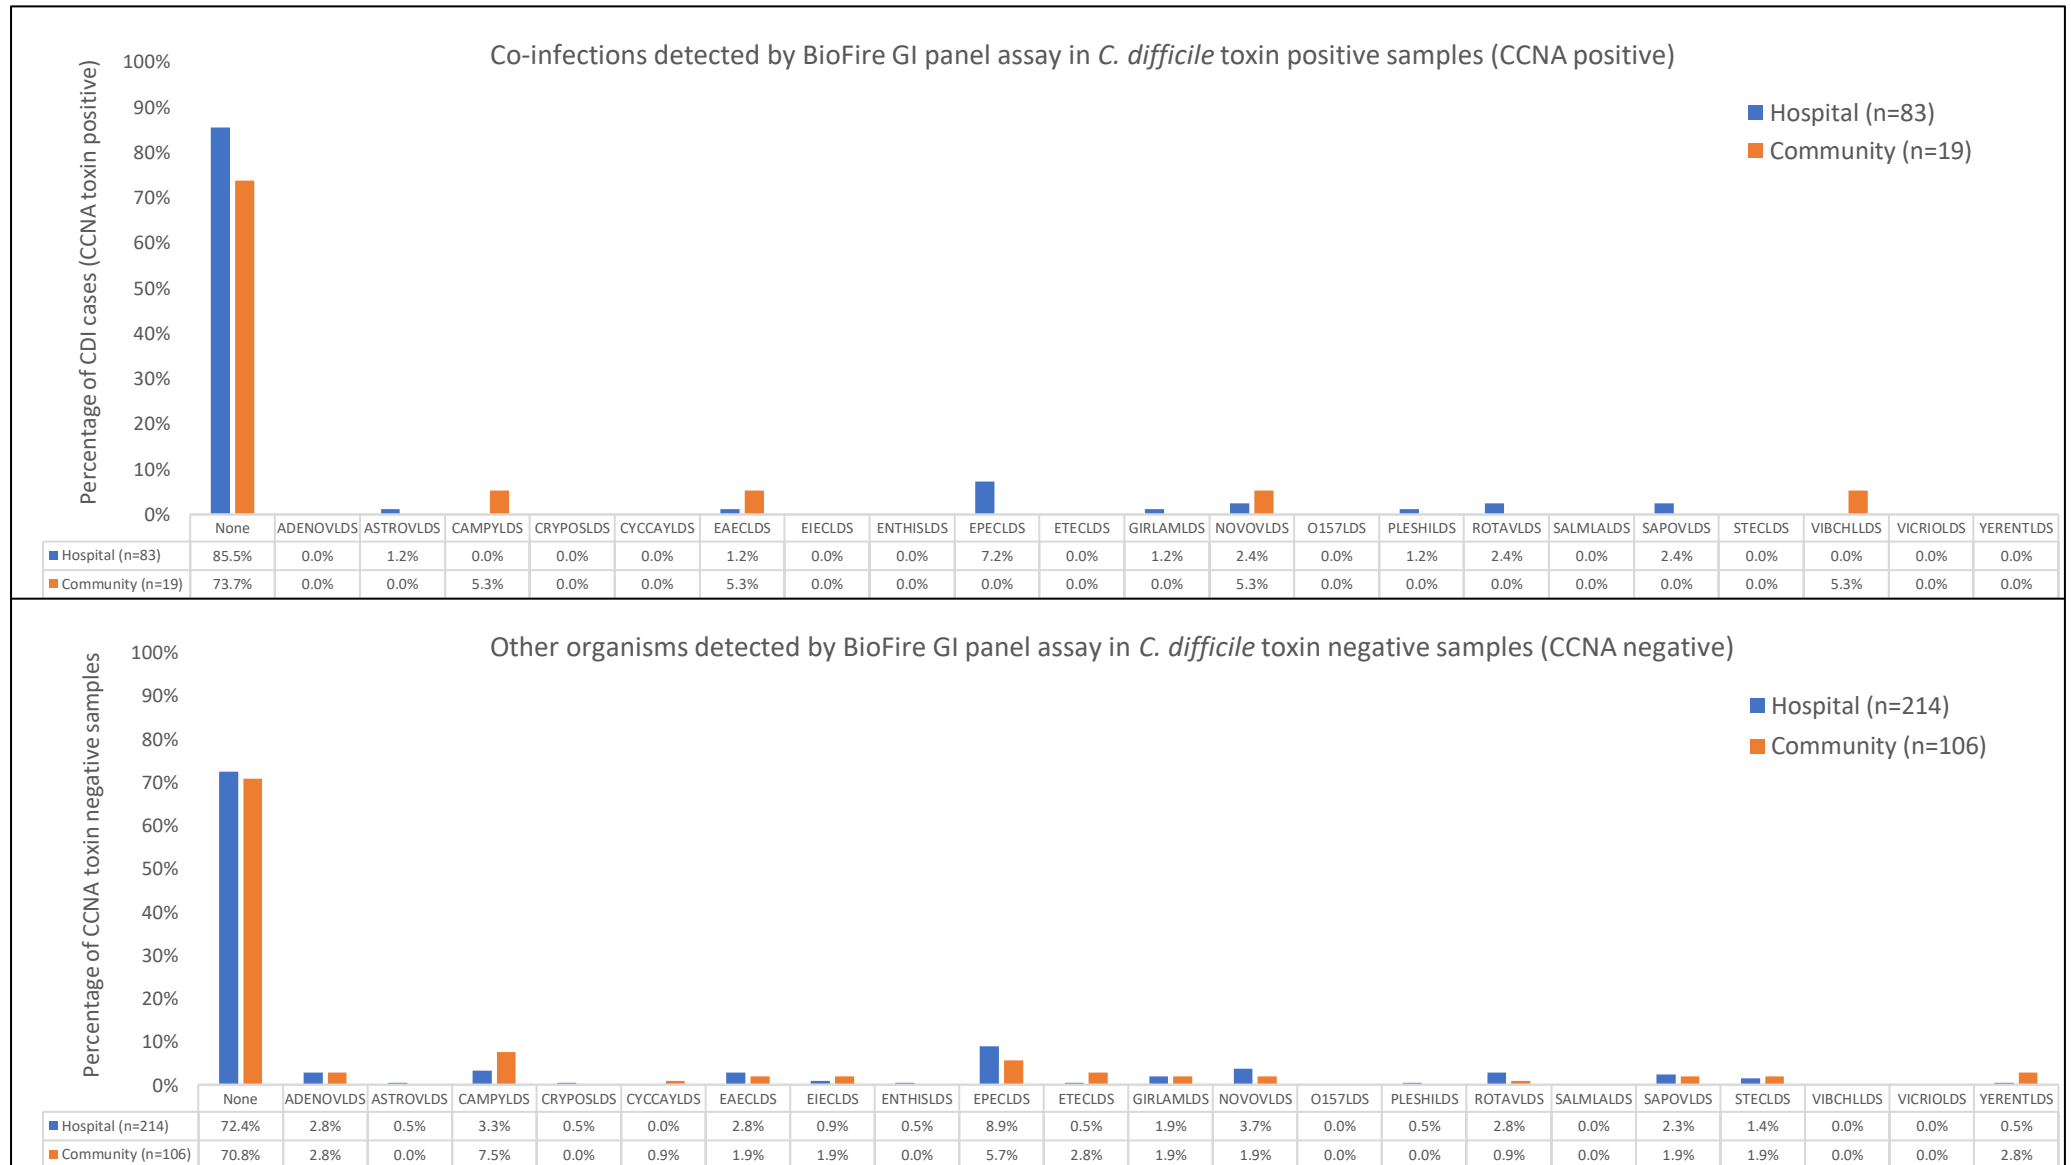

### Supplementary Table S1. Metadata of undiagnosed CDI cases.

Metadata was as reported in medical records, Europe, 2018.

CDI= *Clostridioides difficile* infection

n/a= Data not available

| Missed cases #  | Age groups in years | CDI test previous 6 months | Other enteropathogens positive result if tested | Diagnosis other than CDI                        | Outcome CDI tested following 6 months | Outcome Admitted to hospital within 30 days | Outcome Admitted to hospital 30 days - 6 months        | Outcome Died   | Summary finding: Reason for not being tested                                             |
|-----------------|---------------------|----------------------------|-------------------------------------------------|-------------------------------------------------|---------------------------------------|---------------------------------------------|--------------------------------------------------------|----------------|------------------------------------------------------------------------------------------|
| <b>Hospital</b> |                     |                            |                                                 |                                                 |                                       |                                             |                                                        |                |                                                                                          |
| #1              | <5                  | No                         | none detected                                   | Feeding difficulties                            | n/a                                   | No                                          | No                                                     | No             | Paediatric                                                                               |
| #2              | <5                  | No                         | none detected                                   | Dehydration                                     | n/a                                   | No                                          | No                                                     | No             | Paediatric                                                                               |
| #3              | <5                  | No                         | Rotavirus                                       | Rotavirus infection                             | No                                    | Yes (5 days) for diarrhoea and rotavirus    | Yes (57, 77, 113 days) for diarrhoea and renal failure | No             | Paediatric and other infection detected                                                  |
| #4              | <5                  | No                         | Adenovirus, Metapneumovirus                     | Viral pneumonia                                 | No                                    | No                                          | No                                                     | No             | Paediatric and other infection detected                                                  |
| #5              | <5                  | No                         | Rotavirus                                       | Enterocolitis                                   | n/a                                   | No                                          | No                                                     | No             | Paediatric and other infection detected                                                  |
| #6              | <5                  | No                         | Respiratory Enterovirus                         | Acute gastroenteritis                           | No                                    | No                                          | No                                                     | No             | Paediatric and other infection detected                                                  |
| #7              | 65-84               | No                         | none detected                                   | Lymphoma, Chronic obstructive pulmonary disease | No                                    | No                                          | No                                                     | No             | Missed case; no report of CDI testing but was treated with antibiotic for CDI            |
| #8              | 65-84               | Yes                        | Adenovirus, Norovirus, Rotavirus                | Steatohepatitis non alcoholic                   | n/a                                   | No                                          | n/a                                                    | No             | Another sample tested positive, not true missed case                                     |
| #9              | 65-84               | Yes                        | No other test done                              | Data not available                              | No                                    | Yes (date unknown)                          | Yes (118, 135 days) for abdominal pain                 | Yes (139 days) | Missed case; recurrent CDI (positive 53 days before, but negative 30 days before sample) |
| #10             | 65-84               | No                         | none detected                                   | Pneumonia                                       | Yes positive (40,80 days)             | No                                          | Yes (33, 78 days,) for pneumonia                       | Yes (84 days)  | Missed case; lack clinical suspicion                                                     |

|                  |       |                         |                            |                                            |                                          |                             |                           |              |                                                               |
|------------------|-------|-------------------------|----------------------------|--------------------------------------------|------------------------------------------|-----------------------------|---------------------------|--------------|---------------------------------------------------------------|
| #11              | >85   | Yes                     | none detected              | Dehydration                                | n/a                                      | n/a                         | n/a                       | n/a          | Another sample tested positive, not true missed case          |
| <b>Community</b> |       |                         |                            |                                            |                                          |                             |                           |              |                                                               |
| #1               | <5    | No                      | none detected              | Prolonged diarrhoea                        | No                                       | No                          | No                        | No           | Paediatric                                                    |
| #2               | <5    | No                      | No other test done         | Data not available                         | No                                       | No                          | No                        | No           | Paediatric                                                    |
| #3               | 18-49 | No                      | Enterohaemorrhagic E. coli | Gastroenteritis                            | No                                       | No                          | No                        | No           | Missed case; CDI not suspected as other infection detected    |
| #4               | 18-49 | No                      | No other test done         | Gastroenteritis                            | No                                       | No                          | No                        | No           | Missed case; lack clinical suspicion                          |
| #5               | 18-49 | No                      | Campylobacter              | Data not available                         | No                                       | Data not available          | Data not available        | No           | Missed case; CDI not suspected as other infection detected    |
| #6               | 18-49 | No                      | none detected              | None                                       | No                                       | No                          | No                        | No           | Missed case; lack clinical suspicion                          |
| #7               | 50-64 | No                      | No other test done         | Complications of surgical and medical care | No                                       | No                          | No                        | No           | Missed case; lack clinical suspicion                          |
| #8               | 50-64 | No                      | No other test done         | Data not available                         | No                                       | No                          | No                        | No           | Missed case; lack clinical suspicion                          |
| #9               | 50-64 | No                      | No other test done         | Diarrhoea                                  | Yes positive (25, 57, 79, 125, 163 days) | Yes (25 days) for diarrhoea | Yes (58, 80 days) for CDI | No           | Missed case; lack clinical suspicion                          |
| #10              | 50-64 | Yes negative (102 days) | none detected              | Data not available                         | Yes negative (2 days)                    | No                          | No                        | Yes (3 days) | Missed case; test for CDI was negative 102 days before sample |
| #11              | 65-84 | No                      | none detected              | Data not available                         | No                                       | No                          | No                        | No           | Missed case; lack clinical suspicion                          |

**Supplementary Table S2. Features, previous exposure, and co-morbidities of undiagnosed adult CDI cases.**

Features, previous exposure, and co-morbidities, as reported in medical records, Europe, 2018.

CDI= *Clostridioides difficile* infection

n/a= Data not available

| Missed cases #   | Age groups in years | Days of diarrhoea before the sample | Contact HCF (6 months prior) | Contact infant (3 months prior) | Antibiotic use (12 weeks prior)                               | Co-morbidities                                                                     | Charlson Index | White cell count 10 <sup>9</sup> /Liter | Has the patient ever had CDI? | Treated with antibiotic for CDI |
|------------------|---------------------|-------------------------------------|------------------------------|---------------------------------|---------------------------------------------------------------|------------------------------------------------------------------------------------|----------------|-----------------------------------------|-------------------------------|---------------------------------|
| <b>Hospital</b>  |                     |                                     |                              |                                 |                                                               |                                                                                    |                |                                         |                               |                                 |
| #7               | 65-84               | 40                                  | Yes                          | n/a                             | Cephalosporins, Clindamycin, Fluoroquinolones                 | Chronic obstructive pulmonary disease, Pneumonia, Solid tumour within last 5 years | 7              | 21.00                                   | Yes                           | Yes                             |
| #9               | 65-84               | 1                                   | Yes                          | n/a                             | Cephalosporins                                                | Diabetes without organ damage<br>Congestive heart failure,                         | 6              | 13.20                                   | Yes                           | No                              |
| #10              | 65-84               | n/a                                 | No                           | n/a                             | No                                                            | Cerebrovascular disease, Diabetes without organ damage                             | 8              | 8.00                                    | No                            | No                              |
| <b>Community</b> |                     |                                     |                              |                                 |                                                               |                                                                                    |                |                                         |                               |                                 |
| #3               | 18-49               | 5                                   | No                           | n/a                             | No                                                            | n/a                                                                                | n/a            | 16.10                                   | No                            | No                              |
| #4               | 18-49               | 14                                  | No                           | n/a                             | n/a                                                           | n/a                                                                                | n/a            | n/a                                     | No                            | No                              |
| #5               | 18-49               | n/a                                 | n/a                          | n/a                             | n/a                                                           | n/a                                                                                | n/a            | n/a                                     | No                            | n/a                             |
| #6               | 18-49               | 28                                  | Yes                          | Yes                             | Broad-spectrum Penicillins                                    | None                                                                               | 0              | n/a                                     | n/a                           | No                              |
| #7               | 50-64               | n/a                                 | Yes                          | n/a                             | n/a                                                           | Other                                                                              | 2              | n/a                                     | No                            | No                              |
| #8               | 50-64               | n/a                                 | No                           | n/a                             | Yes: n/a                                                      | n/a                                                                                | n/a            | n/a                                     | No                            | No                              |
| #9               | 50-64               | 6                                   | No                           | n/a                             | No                                                            | n/a                                                                                | n/a            | n/a                                     | Yes                           | No                              |
| #10              | 50-64               | n/a                                 | Yes                          | n/a                             | Broad-spectrum Penicillins, Aminoglycosides, Fluoroquinolones | Chronic kidney disease, Liver disease                                              | 5              | 12.90                                   | No                            | No                              |
| #11              | 65-84               | n/a                                 | No                           | n/a                             | No                                                            | Peripheral vascular disease                                                        | 5              | n/a                                     | No                            | No                              |

**Supplementary Figure S2. Number of PCR ribotypes isolated from samples submitted.**

Numbers are shown in the Venn diagram. The five most common PCR ribotypes isolated from samples submitted across Europe are shown below the Venn diagram (left: isolated from hospital samples; middle: isolated from both hospital and community samples; right: isolated from community samples). PCR ribotypes found in both hospital and community samples are also listed.

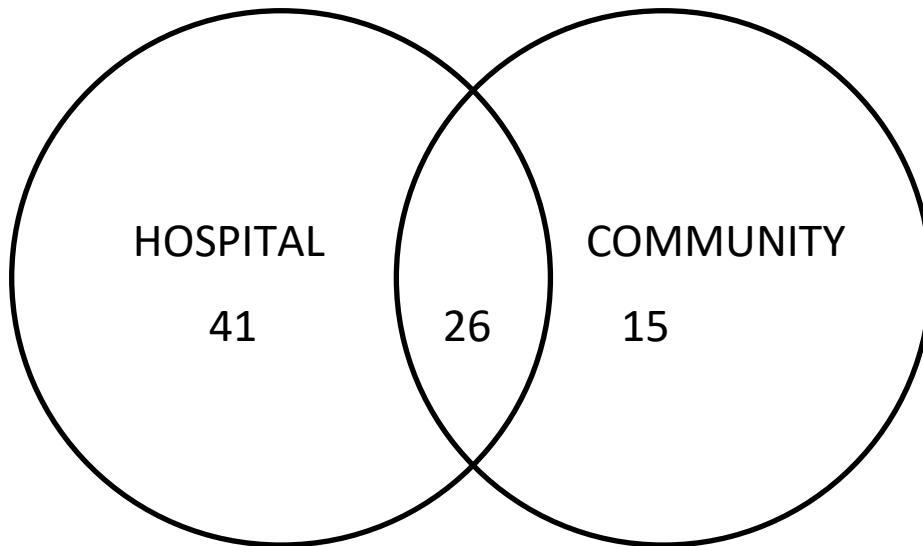

Most common

|    |     |     |          |
|----|-----|-----|----------|
| 1. | 181 | 181 | 078      |
| 2. | 027 | 014 | 039      |
| 3. | 014 | 078 | 001      |
| 4. | 010 | 010 | 020      |
| 5. | 002 | 039 | 009, 010 |

PCR ribotypes found in both hospital and community samples

181, 014, 078, 010, 039, 002, 020, 001, 003, 005, 106, 009, 015, 018, 046, 026, 035, 126, 023, 031, 013, 070, 154, 430, 815, 902.



### Supplementary Table S4. Categorical variables (previous exposure) of cases and CD participants groups.

Cases were participants group CCNA positive (presence of *C. difficile* toxin using reference test).

CD term was chosen to describe participants group CTC positive/CCNA negative/SIMOA negative (presence of *C. difficile* without toxin).

Data are number of patients (%) in hospital or community setting with previous exposure prior to the sample being taken, and calculated odds ratio, 95% CI, Chi-squared p values or Fischers exact test p values (when the cell count was less than 5) of cases versus controls and CD versus controls. Antibiotic use and class of antibiotics refers to antibiotics prescribed for treatment or prophylaxis of an infection other than CDI in the preceding 12 weeks. Significant variables are highlighted in bold (p values <0.05 and 95% CI that do not include 1.0).

CCNA: cell-cytotoxin neutralisation assay; CDI: *Clostridioides difficile* infection; CI: confidence intervals; CTC: cell cytotoxicigenic culture; n= number of participants exposed to indicated variable. ; N= total number of participants in analysis (with data); na=not able to compute odds ratio due to a value of 0 in one of the groups; p: p values; SIMOA: ultra-sensitive toxin single molecule array.

| Variable/Exposure                                    | Cases                | CD            | Controls               | Cases vs. Controls       |                   | CD vs. Controls     |      |
|------------------------------------------------------|----------------------|---------------|------------------------|--------------------------|-------------------|---------------------|------|
|                                                      | % (n/N)              | % (n/N)       | % (n/N)                | Odds ratio [95% CI]      | p                 | Odds ratio [95% CI] | p    |
| Contact with healthcare facility (previous 6 months) |                      |               |                        |                          |                   |                     |      |
| Hospital                                             | <b>81.0%</b> (51/63) | 62.5% (10/16) | <b>53.9%</b> (138/256) | <b>3.63 [1.80-5.35]</b>  | <b>&lt;0.0001</b> | 1.43 [0.50-4.04]    | 0.50 |
| Community                                            | 53.0% (9/17)         | 42.9% (6/14)  | 38.8% (45/116)         | 1.78 [0.64-4.94]         | 0.27              | 1.18 [0.39-3.64]    | 0.77 |
| Contact with CDI (previous 3 months)                 |                      |               |                        |                          |                   |                     |      |
| Hospital                                             | 2.9% (1/35)          | 0% (0/7)      | 0.8% (1/118)           | 3.44 [0.21-56.5]         | 0.41              | na [na]             | 1.00 |
| Community                                            | 0% (0/4)             | 0% (0/8)      | 2.0% (1/49)            | na [na]                  | 1.00              | na [na]             | 1.00 |
| Contact with infant (previous 3 months)              |                      |               |                        |                          |                   |                     |      |
| Hospital                                             | 3.7% (1/27)          | 0% (0/5)      | 7.8% (7/90)            | 0.46 [0.05-3.88]         | 0.68              | na [na]             | 1.00 |
| Community                                            | 33.3% (1/3)          | 0% (0/4)      | 10.7% (3/28)           | 4.17 [0.29-60.9]         | 0.35              | na [na]             | 1.00 |
| Antibiotic use (previous 12 weeks)                   |                      |               |                        |                          |                   |                     |      |
| ≥ one antibiotic                                     |                      |               |                        |                          |                   |                     |      |
| Hospital                                             | <b>76.1%</b> (51/67) | 75.0% (12/16) | <b>60.9%</b> (157/258) | <b>2.05 [1.11-3.79]</b>  | <b>0.02</b>       | 1.93 [0.61-6.15]    | 0.26 |
| Community                                            | <b>46.2%</b> (6/13)  | 9.1% (1/11)   | <b>17.7%</b> (17/96)   | <b>3.98 [1.19-13.4]</b>  | <b>0.03</b>       | 0.47 [0.06-3.88]    | 0.69 |
| > one antibiotic                                     |                      |               |                        |                          |                   |                     |      |
| Hospital                                             | 43.3% (29/67)        | 43.8% (7/16)  | 38.0% (98/258)         | 1.25 [0.72-2.15]         | 0.43              | 1.27 [0.46-3.52]    | 0.65 |
| Community                                            | <b>23.1%</b> (3/13)  | 0% (0/11)     | <b>2.1%</b> (2/96)     | <b>14.10 [2.10-94.7]</b> | <b>0.01</b>       | na [na]             | 1.00 |
| > two antibiotics                                    |                      |               |                        |                          |                   |                     |      |
| Hospital                                             | 23.9% (16/67)        | 18.8% (3/16)  | 23.6% (61/258)         | 1.01 [0.54-1.90]         | 0.97              | 0.75 [0.21-2.70]    | 0.77 |
| Community                                            | <b>23.1%</b> (3/13)  | 0% (0/11)     | <b>2.1%</b> (2/96)     | <b>14.10 [2.10-94.7]</b> | <b>0.01</b>       | na [na]             | 1.00 |
| > three antibiotics                                  |                      |               |                        |                          |                   |                     |      |
| Hospital                                             | 11.9% (8/67)         | 6.3% (1/16)   | 15.1% (39/258)         | 0.76 [0.34-1.72]         | 0.51              | 0.37 [0.05-2.92]    | 0.48 |
| Community                                            | 15.4% (2/13)         | 0% (0/11)     | 0% (0/96)              | na [na]                  | <b>0.01</b>       | na [na]             | 1.00 |
| Class of antibiotic (previous 12 weeks)              |                      |               |                        |                          |                   |                     |      |
| Narrow spectrum penicillins                          |                      |               |                        |                          |                   |                     |      |
| Hospital                                             | 6.0% (4/67)          | 6.3% (1/16)   | 10.9% (28/258)         | 0.52 [0.18-1.54]         | 0.23              | 0.55 [0.07-4.31]    | 1.00 |
| Community                                            | 0% (0/13)            | 9.1% (1/11)   | 2.1% (2/96)            | na [na]                  | 1.00              | 4.70 [0.39-56.5]    | 0.28 |
| Broad spectrum penicillins                           |                      |               |                        |                          |                   |                     |      |
| Hospital                                             | 20.9% (14/67)        | 37.5% (6/16)  | 30.2% (78/258)         | 0.61 [0.32-1.16]         | 0.13              | 1.39 [0.49-3.94]    | 0.58 |
| Community                                            | <b>30.8%</b> (4/13)  | 0% (0/11)     | <b>5.2%</b> (5/96)     | <b>8.09 [1.84-35.6]</b>  | <b>0.01</b>       | na [na]             | 1.00 |



|                                    |                      |              |                       |                         |             |                  |      |
|------------------------------------|----------------------|--------------|-----------------------|-------------------------|-------------|------------------|------|
| Cephalosporins                     |                      |              |                       |                         |             |                  |      |
| Hospital                           | <b>31.3%</b> (21/67) | 18.8% (3/16) | <b>18.6%</b> (48/258) | <b>2.00 [1.09-3.65]</b> | <b>0.02</b> | 1.01 [0.28-3.68] | 1.00 |
| Community                          | 7.7% (1/13)          | 0% (0/11)    | 0% (0/96)             | na [na]                 | 0.12        | na [na]          | na   |
| Other betalactams                  |                      |              |                       |                         |             |                  |      |
| Hospital                           | 7.5% (5/67)          | 0% (0/16)    | 9.7% (25/258)         | 0.75 [0.28-2.04]        | 0.58        | na [na]          | 0.38 |
| Community                          | 7.7% (1/13)          | 0% (0/11)    | 1.0% (1/96)           | 7.92 [0.46-135.0]       | 0.23        | na [na]          | 1.00 |
| Tetracyclines                      |                      |              |                       |                         |             |                  |      |
| Hospital                           | 4.5% (3/67)          | 0% (0/16)    | 1.2% (3/258)          | 3.98 [0.79-20.2]        | 0.11        | na [na]          | 1.00 |
| Community                          | 0% (0/13)            | 0% (0/11)    | 2.1% (2/96)           | na [na]                 | 1.00        | na [na]          | 1.00 |
| Aminoglycosides                    |                      |              |                       |                         |             |                  |      |
| Hospital                           | 6.0% (4/67)          | 6.3% (1/16)  | 4.3% (11/258)         | 1.43 [0.44-4.63]        | 0.52        | 1.50 [0.18-12.4] | 0.52 |
| Community                          | 7.7% (1/13)          | 0% (0/11)    | 1.0% (1/96)           | 7.92 [0.46-135.0]       | 0.23        | na [na]          | 1.00 |
| Macrolides                         |                      |              |                       |                         |             |                  |      |
| Hospital                           | 7.5% (5/67)          | 0% (0/16)    | 7.8% (20/258)         | 0.96 [0.35-2.66]        | 0.94        | na [na]          | 0.62 |
| Community                          | 0% (0/13)            | 0% (0/11)    | 1.0% (1/96)           | na [na]                 | 1.00        | na [na]          | 1.00 |
| Clindamycin                        |                      |              |                       |                         |             |                  |      |
| Hospital                           | 3.0% (2/67)          | 0% (0/16)    | 3.9% (10/258)         | 0.76 [0.16-3.57]        | 1.00        | na [na]          | 1.00 |
| Community                          | 0% (0/13)            | 0% (0/11)    | 0% (0/96)             | na [na]                 | na          | na [na]          | na   |
| Sulphonamides                      |                      |              |                       |                         |             |                  |      |
| Hospital                           | 3.0% (2/67)          | 0% (0/16)    | 1.9% (5/258)          | 1.56 [0.30-8.21]        | 0.64        | na [na]          | 1.00 |
| Community                          | 0% (0/13)            | 0% (0/11)    | 0% (0/96)             | na [na]                 | na          | na [na]          | na   |
| Trimethoprim                       |                      |              |                       |                         |             |                  |      |
| Hospital                           | 3.0% (2/67)          | 12.5% (2/16) | 3.5% (9/258)          | 0.85 [0.18-4.04]        | 1.00        | 3.95 [0.78-20.1] | 0.13 |
| Community                          | 0% (0/13)            | 0% (0/11)    | 1.0% (1/96)           | na [na]                 | 1.00        | na [na]          | 1.00 |
| Antituberculous drugs              |                      |              |                       |                         |             |                  |      |
| Hospital                           | 1.5% (1/67)          | 0% (0/16)    | 0.8% (2/258)          | 1.94 [0.17-21.7]        | 0.50        | na [na]          | 1.00 |
| Community                          | 0% (0/13)            | 0% (0/11)    | 0% (0/96)             | na [na]                 | na          | na [na]          | na   |
| Nitroimidazole                     |                      |              |                       |                         |             |                  |      |
| Hospital                           | 6.0% (4/67)          | 6.3% (1/16)  | 5.0% (13/258)         | 1.20 [0.38-3.80]        | 0.76        | 1.26 [0.15-10.3] | 0.58 |
| Community                          | 7.7% (1/13)          | 0% (0/11)    | 1.0% (1/96)           | 7.92 [0.46-135.0]       | 0.23        | na [na]          | 1.00 |
| Glycopeptides                      |                      |              |                       |                         |             |                  |      |
| Hospital                           | 6.0% (4/67)          | 12.5% (2/16) | 7.0% (18/258)         | 0.85 [0.28-2.59]        | 0.23        | 1.91 [0.40-9.04] | 0.33 |
| Community                          | 7.7% (1/13)          | 0% (0/11)    | 0% (0/96)             | na [na]                 | 0.12        | na [na]          | na   |
| Fluoroquinolones, Other quinolones |                      |              |                       |                         |             |                  |      |
| Hospital                           | <b>25.4%</b> (17/67) | 18.8% (3/16) | <b>13.2%</b> (34/258) | <b>2.24 [1.16-4.33]</b> | <b>0.01</b> | 1.52 [0.41-5.61] | 0.46 |
| Community                          | 15.4% (2/13)         | 0% (0/11)    | 3.1% (3/96)           | 5.64 [0.85-37.5]        | 0.11        | na [na]          | 1.00 |
| Other antibiotics                  |                      |              |                       |                         |             |                  |      |
| Hospital                           | 17.9% (12/67)        | 6.3% (1/16)  | 13.6% (35/258)        | 1.39 [0.68-2.85]        | 0.37        | 0.43 [0.05-3.32] | 0.70 |
| Community                          | 0% (0/13)            | 0% (0/11)    | 3.1% (3/96)           | na [na]                 | 1.00        | na [na]          | 1.00 |

### Supplementary Table S5. Categorical variables (number and type of co-morbidities) of cases and CD participants groups.

Cases were participants group CCNA positive (presence of *C. difficile* toxin using reference test).

CD term was chosen to describe participants group CTC positive/CCNA negative/SIMOA negative (presence of *C. difficile* without toxin).

Data are number of patients (%) in hospital or community setting with reported co-morbidities, and calculated odds ratio, 95% CI, Chi-squared p values or Fischers exact test p values (when the cell count was less than 5) of cases versus controls and CD versus controls. Significant variables are highlighted in bold (p values <0.05 and 95% CI that do not include 1.0).

CCNA: cell-cytotoxin neutralisation assay; CDI: *Clostridioides difficile* infection; CI: confidence intervals; CTC: cell cytotoxigenic culture; n= number of participants exposed to indicated variable. ; N= total number of participants in analysis (with data); na=not able to compute odds ratio due to a value of 0 in one of the groups; p: p values; SIMOA: ultra-sensitive toxin single molecule array.

| Co-morbidities                          | Cases                | CD            | Controls               | Cases vs. Controls      |                   | CD vs. Controls     |      |
|-----------------------------------------|----------------------|---------------|------------------------|-------------------------|-------------------|---------------------|------|
|                                         | % (n/N)              | % (n/N)       | % (n/N)                | Odds ratio [95% CI]     | p                 | Odds ratio [95% CI] | p    |
| <b>With ≥ 2 co-morbidities</b>          |                      |               |                        |                         |                   |                     |      |
| Hospital                                | <b>59.5%</b> (44/74) | 52.9% (9/17)  | <b>43.0%</b> (122/284) | <b>1.95 [1.16-3.28]</b> | <b>0.01</b>       | 1.49 [0.56-3.98]    | 0.42 |
| Community                               | 33.3% (4/12)         | 21.4% (3/14)  | 15.1% (16/106)         | 2.81 [0.76-10.5]        | 0.12              | 1.53 [0.39-6.12]    | 0.46 |
| <b>Charlson index score</b>             |                      |               |                        |                         |                   |                     |      |
| <b>0</b>                                |                      |               |                        |                         |                   |                     |      |
| Hospital                                | 10.8% (8/74)         | 11.8% (2/17)  | 25.4% (72/284)         | 0.36 [0.16-0.78]        | 0.01              | 0.39 [0.09-1.76]    | 0.26 |
| Community                               | 25.0% (3/12)         | 64.3% (9/14)  | 48.1% (51/106)         | 0.36 [0.09-1.40]        | 0.13              | 1.94 [0.61-6.18]    | 0.26 |
| <b>1</b>                                |                      |               |                        |                         |                   |                     |      |
| Hospital                                | 2.7% (2/74)          | 11.8% (2/17)  | 4.2% (12/284)          | 0.63 [0.14-2.88]        | 0.74              | 3.02 [0.62-14.7]    | 0.18 |
| Community                               | 0% (0/12)            | 7.1% (1/14)   | 6.6% (7/106)           | na [na]                 | 1.00              | 1.09 [0.12-9.56]    | 1.00 |
| <b>2</b>                                |                      |               |                        |                         |                   |                     |      |
| Hospital                                | 5.4% (4/74)          | 11.8% (1/17)  | 8.5% (24/284)          | 0.62 [0.21-1.84]        | 0.47              | 1.44 [0.31-6.69]    | 0.65 |
| Community                               | 8.3% (1/12)          | 0% (0/14)     | 13.2% (14/106)         | 0.60 [0.07-4.99]        | 1.00              | na [na]             | 0.37 |
| <b>3</b>                                |                      |               |                        |                         |                   |                     |      |
| Hospital                                | 5.4% (4/74)          | 5.9% (1/17)   | 9.5% (27/284)          | 0.54 [0.18-1.61]        | 0.26              | 0.60 [0.08-4.66]    | 1.00 |
| Community                               | 8.3% (1/12)          | 7.1% (1/14)   | 6.6% (7/106)           | 1.29 [0.14-11.4]        | 0.59              | 1.09 [0.12-9.56]    | 1.00 |
| <b>3+</b>                               |                      |               |                        |                         |                   |                     |      |
| Hospital                                | <b>81.1%</b> (60/74) | 64.7% (11/17) | <b>62.0%</b> (176/284) | <b>2.63 [1.40-4.93]</b> | <b>&lt;0.01</b>   | 1.13 [0.40-3.13]    | 1.00 |
| Community                               | <b>66.7%</b> (8/12)  | 28.6% (4/14)  | <b>32.1%</b> (34/106)  | <b>4.24 [1.19-15.0]</b> | <b>0.03</b>       | 0.85 [0.25-2.90]    | 1.00 |
| <b>4+</b>                               |                      |               |                        |                         |                   |                     |      |
| Hospital                                | <b>75.7%</b> (56/74) | 58.8% (10/17) | <b>52.5%</b> (149/284) | <b>2.82 [1.58-5.03]</b> | <b>&lt;0.0001</b> | 1.29 [0.48-3.50]    | 0.61 |
| Community                               | <b>58.3%</b> (7/12)  | 21.4% (3/14)  | <b>25.5%</b> (27/106)  | <b>4.10 [1.20-14.0]</b> | <b>0.04</b>       | 0.80 [0.21-3.08]    | 1.00 |
| <b>Co-morbidities</b>                   |                      |               |                        |                         |                   |                     |      |
| <b>Cerebrovascular Disease</b>          |                      |               |                        |                         |                   |                     |      |
| Hospital                                | <b>23.0%</b> (17/74) | 5.9% (1/17)   | <b>6.7%</b> (19/284)   | <b>4.16 [2.04-8.50]</b> | <b>&lt;0.0001</b> | 0.87 [0.11-6.93]    | 1.00 |
| Community                               | 8.3% (1/12)          | 0% (0/14)     | 0% (0/106)             | na [na]                 | 0.10              | na [na]             | na   |
| <b>Chronic kidney disease</b>           |                      |               |                        |                         |                   |                     |      |
| Hospital                                | 17.6% (13/74)        | 23.5% (4/17)  | 10.6% (30/284)         | 1.80 [0.89-3.66]        | 0.10              | 2.61 [0.80-8.50]    | 0.11 |
| Community                               | 16.7% (2/12)         | 0% (0/14)     | 6.6% (7/106)           | 2.83 [0.52-15.5]        | 0.23              | na [na]             | na   |
| <b>Solid tumour within last 5 years</b> |                      |               |                        |                         |                   |                     |      |

|                                  |                      |              |                      |                         |                   |                   |      |
|----------------------------------|----------------------|--------------|----------------------|-------------------------|-------------------|-------------------|------|
| Hospital                         | 20.3% (15/74)        | 5.9% (1/17)  | 12.7% (36/284)       | 1.75 [0.90-3.41]        | 0.10              | 0.43 [0.06-3.35]  | 0.71 |
| Community                        | 8.3% (1/12)          | 7.1% (1/14)  | 4.7% (5/106)         | 1.84 [0.20-17.2]        | 0.48              | 1.55 [0.17-14.4]  | 0.53 |
| Pneumonia                        |                      |              |                      |                         |                   |                   |      |
| Hospital                         | <b>17.6%</b> (13/74) | 0% (0/17)    | <b>5.3%</b> (15/284) | <b>3.82 [1.73-8.45]</b> | <b>&lt;0.0001</b> | na [na]           | 1.00 |
| Community                        | 0% (0/12)            | 0% (0/14)    | 0% (0/106)           | na [na]                 | na                | na [na]           | na   |
| Diabetes without organ damage    |                      |              |                      |                         |                   |                   |      |
| Hospital                         | 14.9% (11/74)        | 5.9% (1/17)  | 8.5% (24/284)        | 1.89 [0.88-4.06]        | 0.10              | 0.68 [0.10-5.33]  | 1.00 |
| Community                        | 16.7% (2/12)         | 7.1% (1/14)  | 6.6% (7/106)         | 2.83 [0.52-15.5]        | 0.23              | 1.09 [0.12-9.56]  | 1.00 |
| UTI                              |                      |              |                      |                         |                   |                   |      |
| Hospital                         | <b>14.9%</b> (11/74) | 11.8% (2/17) | <b>6.3%</b> (18/284) | <b>2.58 [1.16-5.74]</b> | <b>0.02</b>       | 1.97 [0.42-9.29]  | 0.31 |
| Community                        | 8.3% (1/12)          | 7.1% (1/14)  | 0% (0/106)           | na [na]                 | 0.10              | na [na]           | 0.12 |
| Mental Disorientation            |                      |              |                      |                         |                   |                   |      |
| Hospital                         | <b>12.2%</b> (9/74)  | 5.9% (1/17)  | <b>4.6%</b> (13/284) | <b>2.89 [1.18-7.04]</b> | <b>0.03</b>       | 1.30 [0.16-10.6]  | 0.57 |
| Community                        | 0% (0/12)            | 0% (0/14)    | 0.9% (1/106)         | na [na]                 | 1.00              | na [na]           | 1.00 |
| Peripheral Vascular Disease      |                      |              |                      |                         |                   |                   |      |
| Hospital                         | 13.5% (10/74)        | 11.8% (2/17) | 7.7% (22/284)        | 1.86 [0.84-4.12]        | 0.19              | 1.59 [0.34-7.39]  | 0.64 |
| Community                        | 8.3% (1/12)          | 7.1% (1/14)  | 1.9% (2/106)         | 4.73 [0.40-56.4]        | 0.28              | 4.00 [0.34-47.2]  | 0.31 |
| Congestive Heart Failure         |                      |              |                      |                         |                   |                   |      |
| Hospital                         | 13.5% (10/74)        | 11.8% (2/17) | 9.5% (27/284)        | 1.49 [0.69-3.23]        | 0.29              | 1.27 [0.28-5.85]  | 0.67 |
| Community                        | 0% (0/12)            | 0% (0/14)    | 2.8% (3/106)         | na [na]                 | 1.00              | na [na]           | 1.00 |
| Dementia                         |                      |              |                      |                         |                   |                   |      |
| Hospital                         | 8.1% (6/74)          | 0% (0/17)    | 5.3% (15/284)        | 1.58 [0.59-4.23]        | 0.40              | na [na]           | 1.00 |
| Community                        | 0% (0/12)            | 7.1% (1/14)  | 0.9% (1/106)         | na [na]                 | 1.00              | 8.08 [0.48-137.0] | 0.22 |
| Myocardial Infarction            |                      |              |                      |                         |                   |                   |      |
| Hospital                         | 10.8% (8/74)         | 5.9% (1/17)  | 7.0% (20/284)        | 1.60 [0.68-3.79]        | 0.28              | 0.83 [0.10-6.54]  | 1.00 |
| Community                        | 0% (0/12)            | 7.1% (1/14)  | 1.9% (2/106)         | na [na]                 | 1.00              | 4.00 [0.34-47.2]  | 0.31 |
| COPD                             |                      |              |                      |                         |                   |                   |      |
| Hospital                         | 8.1% (6/74)          | 5.9% (1/17)  | 7.7% (22/284)        | 1.05 [0.41-2.69]        | 0.92              | 0.74 [0.09-5.88]  | 1.00 |
| Community                        | 0% (0/12)            | 0% (0/14)    | 0.9% (1/106)         | na [na]                 | 1.00              | na [na]           | 1.00 |
| Moderate or severe liver disease |                      |              |                      |                         |                   |                   |      |
| Hospital                         | 8.1% (6/74)          | 11.8% (2/17) | 6.7% (19/284)        | 1.23 [0.47-3.20]        | 0.67              | 1.86 [0.40-8.74]  | 0.34 |
| Community                        | 8.3% (1/12)          | 0% (0/14)    | 0.9% (1/106)         | na [na]                 | 0.10              | na [na]           | na   |
| Diabetes with organ damage       |                      |              |                      |                         |                   |                   |      |
| Hospital                         | 6.8% (5/74)          | 17.6% (3/17) | 5.6% (16/284)        | 1.21 [0.43-3.43]        | 0.78              | 3.59 [0.94-13.8]  | 0.08 |
| Community                        | 0% (0/12)            | 7.1% (1/14)  | 5.7% (6/106)         | na [na]                 | 1.00              | 1.28 [0.14-11.5]  | 0.59 |
| Chemotherapy previous 12 weeks   |                      |              |                      |                         |                   |                   |      |
| Hospital                         | 2.7% (2/74)          | 11.8% (2/17) | 7.7% (22/284)        | 0.33 [0.08-1.44]        | 0.19              | 1.59 [0.34-7.39]  | 0.64 |
| Community                        | 0% (0/12)            | 7.1% (1/14)  | 3.8% (4/106)         | na [na]                 | na                | 1.96 [0.20-18.9]  | 0.47 |
| Leukaemia within last 5 years    |                      |              |                      |                         |                   |                   |      |
| Hospital                         | 2.7% (2/74)          | 5.9% (1/17)  | 2.8% (8/284)         | 0.96 [0.20-4.61]        | 1.00              | 2.16 [0.25-18.3]  | 0.41 |
| Community                        | 0% (0/12)            | 0% (0/14)    | 0% (0/106)           | na [na]                 | na                | na [na]           | na   |
| Renal RT within 7 days of sample |                      |              |                      |                         |                   |                   |      |
| Hospital                         | 4.1% (3/74)          | 0% (0/17)    | 2.1% (6/284)         | 1.96 [0.48-8.02]        | 0.40              | na [na]           | 1.00 |
| Community                        | 0% (0/12)            | 0% (0/14)    | 0% (0/106)           | na [na]                 | na                | na [na]           | na   |
| Transplant                       |                      |              |                      |                         |                   |                   |      |
| Hospital                         | 4.1% (3/74)          | 5.9% (1/17)  | 4.2% (12/284)        | 0.96 [0.26-3.49]        | 1.00              | 1.42 [0.17-11.6]  | 0.54 |

|                                      |                    |               |                       |                         |                   |                  |      |
|--------------------------------------|--------------------|---------------|-----------------------|-------------------------|-------------------|------------------|------|
| Community                            | 0% (0/12)          | 0% (0/14)     | 3.8% (4/106)          | na [na]                 | 1.00              | na [na]          | 1.00 |
| Other malignancy within last 5 years |                    |               |                       |                         |                   |                  |      |
| Hospital                             | 1.4% (1/74)        | 11.8% (2/17)  | 3.2% (9/284)          | 0.42 [0.05-3.36]        | 0.69              | 4.07 [0.81-20.5] | 0.12 |
| Community                            | 0% (0/12)          | 0% (0/14)     | 1.9% (2/106)          | na [na]                 | 1.00              | na [na]          | 1.00 |
| Connective Tissue Disease            |                    |               |                       |                         |                   |                  |      |
| Hospital                             | 2.7% (2/74)        | 5.9% (1/17)   | 1.1% (3/284)          | 2.60 [0.43-15.9]        | 0.28              | 5.85 [0.58-59.5] | 0.21 |
| Community                            | 0% (0/12)          | 0% (0/14)     | 0% (0/106)            | na [na]                 | na                | na [na]          | na   |
| Lymphoma within last 5 years         |                    |               |                       |                         |                   |                  |      |
| Hospital                             | 2.7% (2/74)        | 0% (0/17)     | 2.5% (7/284)          | 1.10 [0.22-5.41]        | 1.00              | na [na]          | 1.00 |
| Community                            | 0% (0/12)          | 0% (0/14)     | 0.9% (1/106)          | na [na]                 | 1.00              | na [na]          | na   |
| Hemiplegia                           |                    |               |                       |                         |                   |                  |      |
| Hospital                             | 0% (0/74)          | 5.9% (1/17)   | 1.4% (4/284)          | na [na]                 | 0.59              | 4.38 [0.46-41.5] | 0.25 |
| Community                            | 8.3% (1/12)        | 0% (0/14)     | 0% (0/106)            | na [na]                 | 0.10              | na [na]          | na   |
| Mild liver disease                   |                    |               |                       |                         |                   |                  |      |
| Hospital                             | 1.4% (1/74)        | 5.9% (1/17)   | 1.4% (4/284)          | 0.96 [0.11-8.71]        | 1.00              | 4.38 [0.46-41.5] | 0.25 |
| Community                            | 0% (0/12)          | 0% (0/14)     | 1.9% (2/106)          | na [na]                 | 1.00              | na [na]          | 1.00 |
| Radiotherapy previous 12 weeks       |                    |               |                       |                         |                   |                  |      |
| Hospital                             | 1.4% (1/74)        | 0% (0/17)     | 1.1% (3/284)          | 1.28 [0.13-12.5]        | 1.00              | na [na]          | 1.00 |
| Community                            | 0% (0/12)          | 7.1% (1/14)   | 3.8% (4/106)          | na [na]                 | na                | na [na]          | 0.12 |
| Cardiac Arrest previous 7 days       |                    |               |                       |                         |                   |                  |      |
| Hospital                             | 1.4% (1/74)        | 0% (0/17)     | 0.4% (1/284)          | 3.88 [0.24-62.7]        | 0.37              | na [na]          | 1.00 |
| Community                            | 0% (0/12)          | 0% (0/14)     | 0% (0/106)            | na [na]                 | na                | na [na]          | na   |
| AIDS not just HIV positive           |                    |               |                       |                         |                   |                  |      |
| Hospital                             | 0% (0/74)          | 0% (0/17)     | 0% (0/106)            | na [na]                 | na                | na [na]          | na   |
| Community                            | 0% (0/12)          | 0% (0/14)     | 0% (0/106)            | na [na]                 | na                | na [na]          | na   |
| HIV positive                         |                    |               |                       |                         |                   |                  |      |
| Hospital                             | 0% (0/74)          | 0% (0/17)     | 0% (0/106)            | na [na]                 | na                | na [na]          | na   |
| Community                            | 0% (0/12)          | 0% (0/14)     | 3.8% (4/106)          | na [na]                 | 1.00              | na [na]          | 1.00 |
| Peptic Ulcer Disease                 |                    |               |                       |                         |                   |                  |      |
| Hospital                             | 0% (0/74)          | 0% (0/17)     | 0% (0/106)            | na [na]                 | na                | na [na]          | na   |
| Community                            | 0% (0/12)          | 0% (0/14)     | 0% (0/106)            | na [na]                 | na                | na [na]          | na   |
| Cystic Fibrosis                      |                    |               |                       |                         |                   |                  |      |
| Hospital                             | 0% (0/74)          | 0% (0/17)     | 0% (0/106)            | na [na]                 | na                | na [na]          | na   |
| Community                            | 0% (0/12)          | 0% (0/14)     | 0% (0/106)            | na [na]                 | na                | na [na]          | na   |
| Other comorbidities listed           |                    |               |                       |                         |                   |                  |      |
| Hospital                             | 31.1% (23/74)      | 23.5% (4/17)  | 30.6% (87/284)        | 1.02 [0.59-1.78]        | 0.94              | 0.70 [0.22-2.20] | 0.54 |
| Community                            | 16.7% (2/12)       | 14.3% (2/14)  | 17.9% (19/106)        | 0.92 [0.19-4.52]        | 1.00              | 0.76 [0.16-3.69] | 1.00 |
| None                                 |                    |               |                       |                         |                   |                  |      |
| Hospital                             | <b>9.5%</b> (7/74) | 17.6% (3/17)  | <b>29.2%</b> (83/284) | <b>0.25 [0.11-0.57]</b> | <b>&lt;0.0001</b> | 0.52 [0.15-1.85] | 0.41 |
| Community                            | 41.7% (5/12)       | 71.4% (10/14) | 58.5% (62/106)        | 0.51 [0.15-1.70]        | 0.27              | 1.77 [0.52-6.02] | 0.35 |

### Supplementary Table S6. Categorical variables (exposure) of SIMOApos participants group.

Categorical variables of patients negative for *C. difficile* infection at the European Coordinating Laboratory but positive for novel SIMOA technology at bioMérieux.

SIMOApos term was chosen to describe participants group SIMOA positive/CCNA negative (presence of *C. difficile* toxin using novel test).

Data are number of patients (%) in hospital or community setting with previous exposure prior to the sample being taken, and calculated odds ratio, 95% CI, Chi-squared p values or Fischers exact test p values (when the cell count was less than 5) of SIMOApos versus controls. Antibiotic use and class of antibiotics refers to antibiotics prescribed for treatment or prophylaxis of an infection other than CDI in the preceding 12 weeks. Significant variables are highlighted in bold (p values <0.05 and 95% CI that do not include 1.0).

CCNA: cell-cytotoxin neutralisation assay; CDI: *Clostridioides difficile* infection; CI: confidence intervals; n= number of participants exposed to indicated variable. ; N= total number of participants in analysis (with data); na=not able to compute odds ratio due to a value of 0 in one of the groups; p: p values; SIMOA: ultra-sensitive toxin single molecule array.

| Variable/Exposure                                    | SIMOApos           | Controls             | SIMOApos vs. Controls     |             |
|------------------------------------------------------|--------------------|----------------------|---------------------------|-------------|
|                                                      | % (n/N)            | % (n/N)              | Odds ratio [95% CI]       | p           |
| Contact with healthcare facility (previous 6 months) |                    |                      |                           |             |
| Hospital                                             | 56.7% (17/30)      | 53.9% (138/256)      | 1.12 [0.52-2.40]          | 0.77        |
| Community                                            | 83.3% (5/6)        | 38.8% (45/116)       | 7.89 [0.89-69.7]          | 0.04        |
| Contact with CDI (previous 3 months)                 |                    |                      |                           |             |
| Hospital                                             | 8.3% (1/12)        | 0.8% (1/118)         | 10.64 [0.62-182.0]        | 0.18        |
| Community                                            | 33.3% (1/3)        | 2.0% (1/49)          | 24.0 [1.07-539.1]         | 0.11        |
| Contact with infant (previous 3 months)              |                    |                      |                           |             |
| Hospital                                             | 0% (0/10)          | 7.8% (7/90)          | na [na]                   | 1.00        |
| Community                                            | 50.0% (1/2)        | 10.7% (3/28)         | 8.33 [0.41-170.7]         | 0.25        |
| Antibiotic use (previous 12 weeks)                   |                    |                      |                           |             |
| ≥ one antibiotic                                     |                    |                      |                           |             |
| Hospital                                             | 76.7% (23/30)      | 60.9% (157/258)      | 2.11 [0.88-5.11]          | 0.09        |
| Community                                            | <b>71.4% (5/7)</b> | <b>17.7% (17/96)</b> | <b>11.62 [2.08-65.0]</b>  | <b>0.01</b> |
| > one antibiotic                                     |                    |                      |                           |             |
| Hospital                                             | 43.3% (13/30)      | 38.0% (98/258)       | 1.25 [0.58-2.68]          | 0.57        |
| Community                                            | <b>28.6% (2/7)</b> | <b>2.1% (2/96)</b>   | <b>18.80 [2.18-162.5]</b> | <b>0.02</b> |
| > two antibiotics                                    |                    |                      |                           |             |
| Hospital                                             | 33.3% (10/30)      | 23.6% (61/258)       | 1.62 [0.72-3.64]          | 0.24        |
| Community                                            | 0% (0/7)           | 2.1% (2/96)          | na [na]                   | 1.00        |
| > three antibiotics                                  |                    |                      |                           |             |
| Hospital                                             | 23.3% (7/30)       | 15.1% (39/258)       | 1.71 [0.69-4.26]          | 0.29        |
| Community                                            | 0% (0/7)           | 0% (0/96)            | na [na]                   | na          |
| Class of antibiotic (previous 12 weeks)              |                    |                      |                           |             |
| Narrow spectrum penicillins                          |                    |                      |                           |             |
| Hospital                                             | 6.7% (2/30)        | 10.9% (28/258)       | 0.59 [0.13-2.60]          | 0.75        |
| Community                                            | 0% (0/7)           | 2.1% (2/96)          | na [na]                   | 1.00        |
| Broad spectrum penicillins                           |                    |                      |                           |             |
| Hospital                                             | 30.0% (9/30)       | 30.2% (78/258)       | 0.99 [0.43-2.26]          | 0.98        |
| Community                                            | 28.6% (2/7)        | 5.2% (5/96)          | 7.28 [1.12-47.3]          | 0.07        |

|                                    |               |                |                    |      |
|------------------------------------|---------------|----------------|--------------------|------|
| Cephalosporins                     |               |                |                    |      |
| Hospital                           | 33.3% (10/30) | 18.6% (48/258) | 2.19 [0.96-4.97]   | 0.06 |
| Community                          | 14.3% (1/7)   | 0% (0/96)      | na [na]            | 0.07 |
| Other betalactams                  |               |                |                    |      |
| Hospital                           | 16.7% (5/30)  | 9.7% (25/258)  | 1.86 [0.66-5.30]   | 0.22 |
| Community                          | 14.3% (1/7)   | 1.0% (1/96)    | 15.83 [0.88-285.5] | 0.13 |
| Tetracyclines                      |               |                |                    |      |
| Hospital                           | 3.3% (1/30)   | 1.2% (3/258)   | 2.93 [0.30-29.1]   | 0.36 |
| Community                          | 0% (0/7)      | 2.1% (2/96)    | na [na]            | 1.00 |
| Aminoglycosides                    |               |                |                    |      |
| Hospital                           | 6.7% (2/30)   | 4.3% (11/258)  | 1.60 [0.34-7.61]   | 0.63 |
| Community                          | 0% (0/7)      | 1.0% (1/96)    | na [na]            | 1.00 |
| Macrolides                         |               |                |                    |      |
| Hospital                           | 6.7% (2/30)   | 7.8% (20/258)  | 0.85 [0.19-3.83]   | 1.00 |
| Community                          | 14.3% (1/7)   | 1.0% (1/96)    | 15.83 [0.88-285.5] | 0.13 |
| Clindamycin                        |               |                |                    |      |
| Hospital                           | 0% (0/30)     | 3.9% (10/258)  | na [na]            | 0.61 |
| Community                          | 0% (0/7)      | 0% (0/96)      | na [na]            | na   |
| Sulphonamides                      |               |                |                    |      |
| Hospital                           | 0% (0/30)     | 1.9% (5/258)   | na [na]            | 1.00 |
| Community                          | 0% (0/7)      | 0% (0/96)      | na [na]            | na   |
| Trimethoprim                       |               |                |                    |      |
| Hospital                           | 3.3% (1/30)   | 3.5% (9/258)   | 0.95 [0.12-7.80]   | 1.00 |
| Community                          | 0% (0/7)      | 1.0% (1/96)    | na [na]            | 1.00 |
| Antituberculous drugs              |               |                |                    |      |
| Hospital                           | 0% (0/30)     | 0.8% (2/258)   | na [na]            | 1.00 |
| Community                          | 0% (0/7)      | 0% (0/96)      | na [na]            | na   |
| Nitroimidazole                     |               |                |                    |      |
| Hospital                           | 6.7% (2/30)   | 5.0% (13/258)  | 1.35 [0.29-6.27]   | 0.66 |
| Community                          | 14.3% (1/7)   | 1.0% (1/96)    | 15.83 [0.88-285.5] | 0.13 |
| Glycopeptides                      |               |                |                    |      |
| Hospital                           | 10.0% (3/30)  | 7.0% (18/258)  | 1.48 [0.41-5.36]   | 0.47 |
| Community                          | 0% (0/7)      | 0% (0/96)      | na [na]            | na   |
| Fluoroquinolones, Other quinolones |               |                |                    |      |
| Hospital                           | 26.7% (8/30)  | 13.2% (34/258) | 2.40 [0.99-5.81]   | 0.06 |
| Community                          | 0% (0/7)      | 3.1% (3/96)    | na [na]            | 1.00 |
| Other antibiotics                  |               |                |                    |      |
| Hospital                           | 20.0% (6/30)  | 13.6% (35/258) | 1.59 [0.61-4.17]   | 0.41 |
| Community                          | 14.3% (1/7)   | 3.1% (3/96)    | 5.17 [0.46-57.5]   | 0.25 |

### Supplementary Table S7. Categorical variables (number and type of co-morbidities) of SIMOApos participants group.

Categorical variables of patients negative for *C. difficile* infection at the European Coordinating Laboratory but positive for novel SIMOA technology at bioMérieux. SIMOApos term was chosen to describe participants group SIMOA positive/CCNA negative (presence of *C. difficile* toxin using novel test).

Data are number of patients (%) in hospital or community setting with reported co-morbidities, and calculated odds ratio, 95% CI, Chi-squared p values or Fischers exact test p values (when the cell count was less than 5) of SIMOApos versus controls. Significant variables are highlighted in bold (p values <0.05 and 95% CI that do not include 1.0).

CCNA: cell-cytotoxin neutralisation assay; CDI: *Clostridioides difficile* infection; CI: confidence intervals; n= number of participants exposed to indicated variable. ; N= total number of participants in analysis (with data); na=not able to compute odds ratio due to a value of 0 in one of the groups; p: p values; SIMOA: ultra-sensitive toxin single molecule array.

| Co-morbidities                          | SIMOApos             | Controls               | SIMOApos vs. Controls    |             |
|-----------------------------------------|----------------------|------------------------|--------------------------|-------------|
|                                         | % (n/N)              | % (n/N)                | OR [95% CI]              | p           |
| <b>With ≥ 2 co-morbidities</b>          |                      |                        |                          |             |
| Hospital                                | 60.0% (21/35)        | 43.0% (122/284)        | 1.99 [0.97-4.08]         | 0.06        |
| Community                               | <b>66.7% (4/6)</b>   | <b>15.1% (16/106)</b>  | <b>11.25 [1.90-66.6]</b> | <b>0.01</b> |
| <b>Charlson index score</b>             |                      |                        |                          |             |
| 0                                       |                      |                        |                          |             |
| Hospital                                | 11.4% (4/35)         | 25.4% (72/284)         | 0.38 [0.13-1.11]         | 0.07        |
| Community                               | 16.7% (1/6)          | 48.1% (51/106)         | 0.22 [0.02-1.91]         | 0.21        |
| 1                                       |                      |                        |                          |             |
| Hospital                                | 8.6% (3/35)          | 4.2% (12/284)          | 2.13 [0.57-7.93]         | 0.22        |
| Community                               | 0% (0/6)             | 6.6% (7/106)           | na [na]                  | 1.00        |
| 2                                       |                      |                        |                          |             |
| Hospital                                | 5.7% (2/35)          | 8.5% (24/284)          | 0.66 [0.15-2.91]         | 0.75        |
| Community                               | 16.7% (1/6)          | 13.2% (14/106)         | 1.31 [0.14-12.1]         | 0.58        |
| 3                                       |                      |                        |                          |             |
| Hospital                                | 0% (0/35)            | 9.5% (27/284)          | na [na]                  | 0.06        |
| Community                               | 16.7% (1/6)          | 6.6% (7/106)           | 2.83 [0.29-27.7.4]       | 0.37        |
| 3+                                      |                      |                        |                          |             |
| Hospital                                | 74.3% (26/35)        | 62.0% (176/284)        | 1.77 [0.80-3.93]         | 0.15        |
| Community                               | 66.7% (4/6)          | 32.1% (34/106)         | 4.24 [0.74-24.3]         | 0.18        |
| 4+                                      |                      |                        |                          |             |
| Hospital                                | <b>74.3% (26/35)</b> | <b>52.5% (149/284)</b> | <b>2.62 [1.18-5.78]</b>  | <b>0.01</b> |
| Community                               | 50.0% (3/6)          | 25.5% (27/106)         | 2.93 [0.56-15.4]         | 0.34        |
| <b>Co-morbidities</b>                   |                      |                        |                          |             |
| <b>Cerebrovascular Disease</b>          |                      |                        |                          |             |
| Hospital                                | 14.3% (5/35)         | 6.7% (19/284)          | 2.33 [0.81-6.68]         | 0.16        |
| Community                               | 0% (0/6)             | 0% (0/106)             | na [na]                  | na          |
| <b>Chronic kidney disease</b>           |                      |                        |                          |             |
| Hospital                                | 17.1% (6/35)         | 10.6% (30/284)         | 1.75 [0.67-4.56]         | 0.26        |
| Community                               | 33.3% (2/6)          | 6.6% (7/106)           | 7.07 [1.10-45.5]         | 0.07        |
| <b>Solid tumour within last 5 years</b> |                      |                        |                          |             |
| Hospital                                | 5.7% (2/35)          | 12.7% (36/284)         | 0.42 [0.10-1.82]         | 0.40        |

|                                  |                     |                      |                         |             |
|----------------------------------|---------------------|----------------------|-------------------------|-------------|
| Community                        | 16.7% (1/6)         | 4.7% (5/106)         | 4.04 [0.39-41.4]        | 0.29        |
| Pneumonia                        |                     |                      |                         |             |
| Hospital                         | 11.4% (4/35)        | 5.3% (15/284)        | 2.31 [0.72-7.41]        | 0.14        |
| Community                        | 0% (0/6)            | 0% (0/106)           | na [na]                 | na          |
| Diabetes without organ damage    |                     |                      |                         |             |
| Hospital                         | 14.3% (5/35)        | 8.5% (24/284)        | 1.81 [0.64-5.08]        | 0.34        |
| Community                        | 0% (0/6)            | 6.6% (7/106)         | na [na]                 | 1.00        |
| UTI                              |                     |                      |                         |             |
| Hospital                         | 11.4% (4/35)        | 6.3% (18/284)        | 1.91 [0.61-6.00]        | 0.28        |
| Community                        | 16.7% (1/6)         | 0% (0/106)           | na [na]                 | 0.06        |
| Mental Disorientation            |                     |                      |                         |             |
| Hospital                         | <b>17.1%</b> (6/35) | <b>4.6%</b> (13/284) | <b>4.31 [1.52-12.2]</b> | <b>0.01</b> |
| Community                        | 16.7% (1/6)         | 0.9% (1/106)         | 21.00 [1.14-386.8]      | 0.11        |
| Peripheral Vascular Disease      |                     |                      |                         |             |
| Hospital                         | 11.4% (4/35)        | 7.7% (22/284)        | 1.54 [0.50-4.75]        | 0.51        |
| Community                        | 16.7% (1/6)         | 1.9% (2/106)         | 10.40 [0.80-134.9]      | 0.15        |
| Congestive Heart Failure         |                     |                      |                         |             |
| Hospital                         | 8.6% (3/35)         | 9.5% (27/284)        | 0.89 [0.26-3.11]        | 1.00        |
| Community                        | 0% (0/6)            | 2.8% (3/106)         | na [na]                 | 1.00        |
| Dementia                         |                     |                      |                         |             |
| Hospital                         | 11.4% (4/35)        | 5.3% (15/284)        | 2.31 [0.72-7.41]        | 0.14        |
| Community                        | 16.7% (1/6)         | 0.9% (1/106)         | 21.00 [1.14-386.8]      | 0.11        |
| Myocardial Infarction            |                     |                      |                         |             |
| Hospital                         | 2.9% (1/35)         | 7.0% (20/284)        | 0.39 [0.05-2.99]        | 0.49        |
| Community                        | 0% (0/6)            | 1.9% (2/106)         | na [na]                 | 1.00        |
| COPD                             |                     |                      |                         |             |
| Hospital                         | 8.6% (3/35)         | 7.7% (22/284)        | 1.12 [0.32-3.94]        | 0.75        |
| Community                        | 0% (0/6)            | 0.9% (1/106)         | na [na]                 | 1.00        |
| Moderate or severe liver disease |                     |                      |                         |             |
| Hospital                         | 5.7% (2/35)         | 6.7% (19/284)        | 0.85 [0.19-3.79]        | 1.00        |
| Community                        | 0% (0/6)            | 0.9% (1/106)         | na [na]                 | na          |
| Diabetes with organ damage       |                     |                      |                         |             |
| Hospital                         | 2.9% (1/35)         | 5.6% (16/284)        | 0.49 [0.06-3.83]        | 0.71        |
| Community                        | 0% (0/6)            | 5.7% (6/106)         | na [na]                 | 1.00        |
| Chemotherapy previous 12 weeks   |                     |                      |                         |             |
| Hospital                         | 8.6% (3/35)         | 7.7% (22/284)        | 1.12 [0.32-3.94]        | 0.75        |
| Community                        | 16.7% (1/6)         | 3.8% (4/106)         | 5.10 [0.48-54.5]        | 0.25        |
| Leukaemia within last 5 years    |                     |                      |                         |             |
| Hospital                         | 8.6% (3/35)         | 2.8% (8/284)         | 3.23 [0.82-12.8]        | 0.11        |
| Community                        | 0% (0/6)            | 0% (0/106)           | na [na]                 | na          |
| Renal RT within 7 days of sample |                     |                      |                         |             |
| Hospital                         | 2.9% (1/35)         | 2.1% (6/284)         | 1.36 [0.16-11.70]       | 0.56        |
| Community                        | 0% (0/6)            | 0% (0/106)           | na [na]                 | na          |
| Transplant                       |                     |                      |                         |             |
| Hospital                         | 2.9% (1/35)         | 4.2% (12/284)        | 0.67 [0.08-5.29]        | 1.00        |
| Community                        | 0% (0/6)            | 3.8% (4/106)         | na [na]                 | 1.00        |



|                                      |                      |                       |                         |             |
|--------------------------------------|----------------------|-----------------------|-------------------------|-------------|
| Other malignancy within last 5 years |                      |                       |                         |             |
| Hospital                             | 5.7% (2/35)          | 3.2% (9/284)          | 1.85 [0.38-8.94]        | 0.35        |
| Community                            | 0% (0/6)             | 1.9% (2/106)          | na [na]                 | 1.00        |
| Connective Tissue Disease            |                      |                       |                         |             |
| Hospital                             | 2.9% (1/35)          | 1.1% (3/284)          | 2.76 [0.28-27.2]        | 0.37        |
| Community                            | 0% (0/6)             | 0% (0/106)            | na [na]                 | na          |
| Lymphoma within last 5 years         |                      |                       |                         |             |
| Hospital                             | 0% (0/35)            | 2.5% (7/284)          | na [na]                 | 1.00        |
| Community                            | 0% (0/6)             | 0.9% (1/106)          | na [na]                 | 1.00        |
| Hemiplegia                           |                      |                       |                         |             |
| Hospital                             | 2.9% (1/35)          | 1.4% (4/284)          | 2.06 [0.22-19.0]        | 0.44        |
| Community                            | 0% (0/6)             | 0% (0/106)            | na [na]                 | na          |
| Mild liver disease                   |                      |                       |                         |             |
| Hospital                             | 0% (0/35)            | 1.4% (4/284)          | na [na]                 | 1.00        |
| Community                            | 0% (0/6)             | 1.9% (2/106)          | na [na]                 | 1.00        |
| Radiotherapy previous 12 weeks       |                      |                       |                         |             |
| Hospital                             | 0% (0/35)            | 1.1% (3/284)          | na [na]                 | 1.00        |
| Community                            | 0% (0/6)             | 3.8% (4/106)          | na [na]                 | na          |
| Cardiac Arrest previous 7 days       |                      |                       |                         |             |
| Hospital                             | 0% (0/35)            | 0.4% (1/284)          | na [na]                 | 1.00        |
| Community                            | 0% (0/6)             | 0% (0/106)            | na [na]                 | na          |
| AIDS not just HIV positive           |                      |                       |                         |             |
| Hospital                             | 2.9% (1/35)          | 0% (0/106)            | na [na]                 | 0.11        |
| Community                            | 0% (0/6)             | 0% (0/106)            | na [na]                 | na          |
| HIV positive                         |                      |                       |                         |             |
| Hospital                             | 0% (0/35)            | 0% (0/106)            | na [na]                 | na          |
| Community                            | 0% (0/6)             | 3.8% (4/106)          | na [na]                 | 1.00        |
| Peptic Ulcer Disease                 |                      |                       |                         |             |
| Hospital                             | 0% (0/35)            | 0% (0/106)            | na [na]                 | na          |
| Community                            | 0% (0/6)             | 0% (0/106)            | na [na]                 | na          |
| Cystic Fibrosis                      |                      |                       |                         |             |
| Hospital                             | 0% (0/35)            | 0% (0/106)            | na [na]                 | na          |
| Community                            | 0% (0/6)             | 0% (0/106)            | na [na]                 | na          |
| Other comorbidities listed           |                      |                       |                         |             |
| Hospital                             | <b>48.6%</b> (17/35) | <b>30.6%</b> (87/284) | <b>2.14 [1.05-4.35]</b> | <b>0.03</b> |
| Community                            | 16.7% (1/6)          | 17.9% (19/106)        | 0.92 [0.10-8.30]        | 1.00        |
| None                                 |                      |                       |                         |             |
| Hospital                             | 20.0% (7/35)         | 29.2% (83/284)        | 0.61 [0.25-1.44]        | 0.25        |
| Community                            | 33.3% (2/6)          | 58.5% (62/106)        | 0.36 [0.06-2.02]        | 0.40        |
